# Supplementary material for: Retrieval of aerosol properties from ceilometer and photometer measurements: long-term evaluation with in situ data and statistical analysis at Montsec (southern Pyrenees)
Source: Copernicus journal article supplement (doi:10.5194/amt-12-3255-2019), 2019-06-19
Supplement: Supplementary file 1 [file amt-12-3255-2019-supplement.pdf]

Supplement of Atmos. Meas. Tech., 12, 3255–3267, 2019  
<https://doi.org/10.5194/amt-12-3255-2019-supplement>  
© Author(s) 2019. This work is distributed under  
the Creative Commons Attribution 4.0 License.

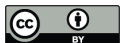

*Supplement of*

**Retrieval of aerosol properties from ceilometer and photometer  
measurements: long-term evaluation with in situ data and  
statistical analysis at Montsec (southern Pyrenees)**

**Gloria Titos et al.**

*Correspondence to:* Gloria Titos (gtitos@ugr.es)

The copyright of individual parts of the supplement might differ from the CC BY 4.0 License.

## Supplementary material

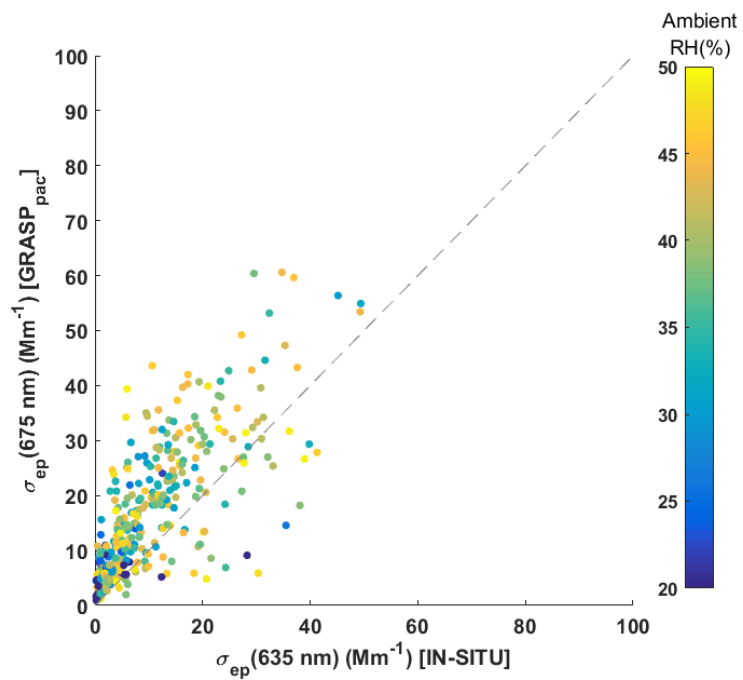

Figure S1: Scatterplot of the aerosol extinction coefficient retrieved with GRASP<sub>pac</sub> and measured in-situ for  $\text{RH}_{\text{ambient}} < 50\%$ . The colour scale represents the ambient RH and the dashed line is the 1:1 line.

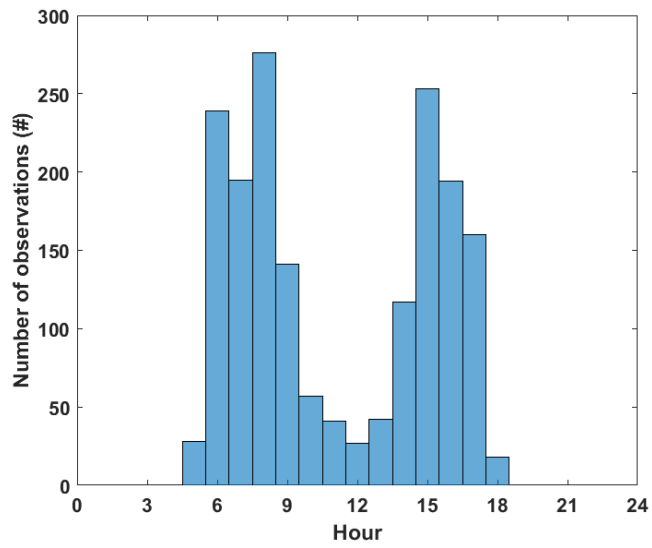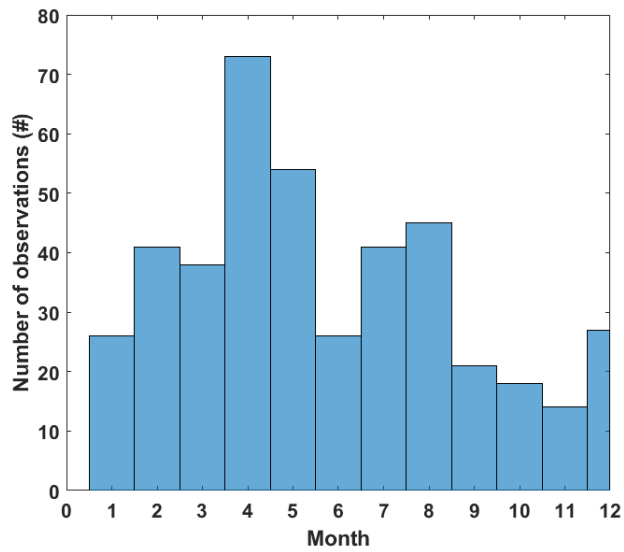

**Figure S2: Frequency distributions of the number of profiles retrieved with GRASP<sub>pac</sub> as a function of hour of the day (upper panel) and month (lower panel).**
